# Supplementary material
Source: Springer Nature journal article supplement (https://www.springermedizin.de/resource/supplementary/12872_2004_47_MOESM1_ESM.pdf/9430902)
Supplement: MOESM1 [file 9430902]

## FRÅGEFORMULÄR PAROXYSMALT FÖRMAKSFLIMMER

1. Har Ni släktingar som har eller har haft hjärtklappningsbesvär?

Föräldrar  
Syskon  
Barn  
Andra släktingar

2. Har Ni tidigare haft hjärtinfarkt?

När? \_\_\_\_\_

Lokalisation \_\_\_\_\_

3. Har Ni tidigare haft hjärtsäcksinflammation?

4. Har Ni tidigare haft sköldkörtelsjukdom?

5. Har Ni sockersjuka (diabetes)?

6. Har Ni vid något tillfälle haft behandling för hypertoni?

7. Tidigare cerebral insult?

8. Har Ni någon neurologisk sjukdom?

Vilken? \_\_\_\_\_

9. Har Ni eller har Ni tidigare haft någon annan sjukdom?

10. När hade Ni hjärtklappning första gången?

11. Hur ofta har/hade Ni hjärtklappning?

Under tiden: \_\_\_\_\_

Utän medicinering

Färre än 1 gång per år

1-3 gånger per år

4-6 gånger per år

7-9 gånger per år

10-11 gånger per år

1-2 gånger per månad

3-4 gånger per månad

1-2 gånger per vecka

3-6 gånger per vecka

1 gång per dag

Fler än 1 gång per dag

Kan ej avgöra

12. Hur ofta har/hade Ni hjärtklappning?

Under tiden: \_\_\_\_\_

Med följande medicinering:

Färre än 1 gång per år

1-3 gånger per år

4-6 gånger per år

7-9 gånger per år

10-11 gånger per år

1-2 gånger per månad

3-4 gånger per månad

1-2 gånger per vecka

3-6 gånger per vecka

1 gång per dag

Fler än 1 gång per dag

Kan ej avgöra

13. Hur ofta har/hade Ni hjärtklappning?  
Under tiden: \_\_\_\_\_  
Med följande medicinering:
- Färre än 1 gång per år  
1-3 gånger per år  
4-6 gånger per år  
7-9 gånger per år  
10-11 gånger per år  
1-2 gånger per månad  
3-4 gånger per månad  
1-2 gånger per vecka  
3-6 gånger per vecka  
1 gång per dag  
Fler än 1 gång per dag  
Kan ej avgöra
14. Hur ofta har Ni hjärtklappning?  
Under tiden: \_\_\_\_\_  
Med följande medicinering:
- Färre än 1 gång per år  
1-3 gånger per år  
4-6 gånger per år  
7-9 gånger per år  
10-11 gånger per år  
1-2 gånger per månad  
3-4 gånger per månad  
1-2 gånger per vecka  
3-6 gånger per vecka  
1 gång per dag  
Fler än 1 gång per dag  
Kan ej avgöra
15. Hur länge varar i allmänhet varje hjärtklappningsepisod?
- Längre än 1 vecka  
4-7 dygn  
1-3 dygn  
12-23 timmar  
3-11 timmar  
1-2 timmar  
30-59 minuter  
Kortare än 15 minuter  
Kan ej avgöra
16. I vilka situationer får Ni hjärtklappning?
- Psykisk stress  
Fysisk ansträngning  
Vila  
Vaknar med det  
Kan ej avgöra
17. När på dygnet börjar hjärtklappningen?
- 00.00 – 03.00  
03.01 – 06.00  
06.01 – 09.00  
09.01 – 12.00  
12.01 – 15.00  
15.01 – 18.00  
18.01 – 21.00  
21.01 – 23.59  
Inget säkert tidsintervall
18. Kan Ni själv bryta hjärtklappningsepisoden?  
Om Ni svarat ja, på vilket sätt kan Ni bryta episoden? \_\_\_\_\_
- 
19. Hur många gånger har Ni blivit elkonverterad?

20. Symptom vid paroxysmalt förmaksflimmerepisod:

|                                   |        |          |      |       |
|-----------------------------------|--------|----------|------|-------|
| Förkänningar av något slag        | Mycket | Måttligt | Lite | Ingen |
| Bröstsmärta                       | Mycket | Måttligt | Lite | Ingen |
| Yrsel                             | Mycket | Måttligt | Lite | Ingen |
| Svimning                          | Mycket | Måttligt | Lite | Ingen |
| Andfäddhet i vila                 | Mycket | Måttligt | Lite | Ingen |
| Andfäddhet vid ansträngning       | Mycket | Måttligt | Lite | Ingen |
| Bensvullnad                       | Mycket | Måttligt | Lite | Ingen |
| Hjärtklappning i vila             | Mycket | Måttligt | Lite | Ingen |
| Hjärtklappning vid ansträngning   | Mycket | Måttligt | Lite | Ingen |
| Illamående                        | Mycket | Måttligt | Lite | Ingen |
| Kräkningar                        | Mycket | Måttligt | Lite | Ingen |
| Buksmärter                        | Mycket | Måttligt | Lite | Ingen |
| Aptitlöshet                       | Mycket | Måttligt | Lite | Ingen |
| Ångest                            | Mycket | Måttligt | Lite | Ingen |
| Nedsatt fysisk prestationsförmåga | Mycket | Måttligt | Lite | Ingen |
| Ökat vattenkastningsbehov         | Mycket | Måttligt | Lite | Ingen |
| Andra symptom: _____              |        |          |      |       |

21. På vilket sätt har Ni eventuella förkänningar? \_\_\_\_\_

22. Faktorer som kan utlösa episoder med paroxysmalt förmaksflimmer:

- Läkemedel Vilka läkemedel \_\_\_\_\_

- Infektioner

- Trötthet

- Fysisk ansträngning

- Psykisk stress

- Födoämnen Mandelmassa  
Nötter  
Choklad  
Lök  
Glass  
Andra födoämnen

- Alkohol Vitt vin  
Rött vin  
Starksprit

- Kaffe

- Nikotin

- Brandrök

- Andra utlösande faktorer \_\_\_\_\_

23. Hur mycket röker Ni?

Har aldrig rökt

Har tidigare rökt men slutat

Slutade för \_\_\_\_\_ år sedan

Hade då rökt under \_\_\_\_\_ år

Röker 1-29 cigaretter per månad

Röker 1-3 cigaretter per dag

Röker 4-6 cigaretter per dag

Röker 7-15 cigaretter per dag

Röker 16-20 cigaretter per dag

Röker mer än 20 cigaretter per dag

Röker pipa

24. Snusar Ni?

Hur mycket?

25. Hur mycket kaffe dricker Ni?

Dricker inte kaffe  
Dricker mindre än 1 kopp per dag  
Dricker 1-2 koppar per dag  
Dricker 3-5 koppar per dag  
Dricker 6-10 koppar per dag  
Dricker mer än 10 koppar per dag

26. Hur mycket alkohol har Ni druckit senaste månaden?  
drycker

Har inte druckit några alkoholhaltiga

Antal lättöl \_\_\_\_\_  
Antal starköl \_\_\_\_\_  
Mängd vin \_\_\_\_\_  
Mängd starksprit \_\_\_\_\_

## LIVSKVALITET

27. Påverkar episoderna av paroxysmalt förmaksflimmer Din livsföring?

Mycket                      Måttligt                      Lite                      Inget

28. På vilket sätt påverkar episoderna Dig? \_\_\_\_\_

29. Vad är det som Du skulle vilja göra men som Du inte kan eller orkar? \_\_\_\_\_

30. Påverkar oron mellan förmaksflimmerepisoderna Din livsföring?

Mycket                      Måttligt                      Lite                      Inget                      Har ingen oro

31. Påverkar episoderna med paroxysmalt förmaksflimmer Dig i Ditt yrke?

Mycket                      Måttligt                      Lite                      Inget

32. Påverkar episoderna med paroxysmalt förmaksflimmer även Dina anhöriga?

Mycket                      Måttligt                      Lite                      Inget

På vilket sätt? \_\_\_\_\_

33. Antiarytmika som provats:

|              |         |     |         |       |              |
|--------------|---------|-----|---------|-------|--------------|
| Digitalis    | effekt: | God | Måttlig | Ingen | Biverkningar |
| B-blockerare | effekt: | God | Måttlig | Ingen | Biverkningar |
| Flekainid    | effekt: | God | Måttlig | Ingen | Biverkningar |
| Kinidin      | effekt: | God | Måttlig | Ingen | Biverkningar |
| Verapamil    | effekt: | God | Måttlig | Ingen | Biverkningar |
| Disopyramid  | effekt: | God | Måttlig | Ingen | Biverkningar |
| Sotalol      | effekt: | God | Måttlig | Ingen | Biverkningar |
| Amiodaron    | effekt: | God | Måttlig | Ingen | Biverkningar |
| _____        | effekt: | God | Måttlig | Ingen | Biverkningar |

34. Aktuell medicinering:

35. Diagnosen paroxysmalt förmaksflimmer ställd hur och när?
